# Supplementary material for: Text Messaging and Mobile Phone Apps as Interventions to Improve Adherence in Adolescents With Chronic Health Conditions: A Systematic Review
Source: PubMed Central journal article supplement (PMC5447825; doi:10.2196/mhealth.7798), 2017-05-15
Supplement: mhealth_v5i5e66_app2.pdf [file mhealth_v5i5e66_app2.pdf]

**PubMed – searched 7.29.15**

((("text messaging"[mesh] OR "cell phones"[mesh] OR app[All Fields] OR apps[All Fields] OR "mobile phone\*" [All Fields] OR "cell phone\*" [All Fields] OR text\*[All Fields]))

AND (adherence[All Fields] OR compliance[All Fields]))

AND ("Young Adult"[Mesh] OR "Adolescent"[Mesh] OR "Child"[Mesh] OR pediatric\*[All Fields] OR child\*[All Fields] OR adolescen\*[All Fields] OR youth\*[All Fields])

Results: 253

---

**Embase – searched 8.5.2015**

(‘text messaging’/exp OR ‘texting’ OR ‘mobile phone’/exp OR ‘cell phone’ OR ‘cell phones’ OR ‘cellular phone’ OR ‘cellular telephone’ OR ‘mobile telephone’ OR ‘mobile application’/exp OR ‘mobile app’ OR ‘mobile applications’ OR ‘mobile apps’ OR ‘portable software app’ OR ‘portable software application’ OR ‘portable software applications’ OR ‘portable software apps’)

AND

(‘patient compliance’/exp OR ‘adherence’ OR ‘compliance’)

AND

(‘child’/exp OR child\* OR ‘juvenile’/exp OR adolescen\* OR teenage\* OR youth\* OR pediatric\*)

Results: 313

---

## Cochrane CENTRAL – searched 8.5.2015

| Add to top |            | View fewer lines                                         |        |
|------------|------------|----------------------------------------------------------|--------|
| –          | + #1       | MeSH descriptor: [Text Messaging] explode all trees      | 160    |
| –          | + #2       | MeSH descriptor: [Cell Phones] explode all trees         | 463    |
| –          | Edit + #3  | app or apps or "mobile phone*" or "cell phone*" or text* | 17419  |
| –          | Edit + #4  | adherence or compliance                                  | 34155  |
| –          | + #5       | MeSH descriptor: [Young Adult] explode all trees         | 278    |
| –          | + #6       | MeSH descriptor: [Adolescent] explode all trees          | 77687  |
| –          | + #7       | MeSH descriptor: [Child] explode all trees               | 188    |
| –          | Edit + #8  | pediatric* or child* or adolescen* or youth*             | 173003 |
| –          | Edit + #9  | #1 or #2 or #3                                           | 17419  |
| –          | Edit + #10 | #5 or #6 or #7 or #8                                     | 173116 |
| –          | Edit + #11 | #9 and #4 and #10                                        | 2316   |
| –          | Edit + #12 |                                                          | N/A    |

Cochrane CENTRAL: 137

## CINAHL – Searched 8.5.2015

| #   | Query            | Limiters/Expanders            | Last Run Via                                                                                                    | Results |
|-----|------------------|-------------------------------|-----------------------------------------------------------------------------------------------------------------|---------|
| S10 | S7 AND S8 AND S9 | Search modes - Boolean/Phrase | Interface - EBSCOhost<br>Research Databases<br>Search Screen - Basic Search<br>Database - CINAHL with Full Text | 101     |
| S9  | S5 OR S6         | Search modes - Boolean/Phrase | Interface - EBSCOhost<br>Research Databases<br>Search Screen - Basic Search                                     | 514,746 |

|    |                                                             |                                  |                                                                                                                                |         |
|----|-------------------------------------------------------------|----------------------------------|--------------------------------------------------------------------------------------------------------------------------------|---------|
|    |                                                             |                                  | Database -<br>CINAHL with Full<br>Text                                                                                         |         |
| S8 | S3 OR S4                                                    | Search modes -<br>Boolean/Phrase | Interface -<br>EBSCOhost<br>Research<br>Databases<br>Search Screen -<br>Basic Search<br>Database -<br>CINAHL with Full<br>Text | 53,397  |
| S7 | S1 OR S2                                                    | Search modes -<br>Boolean/Phrase | Interface -<br>EBSCOhost<br>Research<br>Databases<br>Search Screen -<br>Basic Search<br>Database -<br>CINAHL with Full<br>Text | 16,764  |
| S6 | child* OR adolescen* OR teenage*<br>OR youth* OR pediatric* | Search modes -<br>Boolean/Phrase | Interface -<br>EBSCOhost<br>Research<br>Databases<br>Search Screen -<br>Basic Search<br>Database -<br>CINAHL with Full<br>Text | 493,231 |
| S5 | (MH "Young Adult") OR (MH<br>"Adolescence") OR (MH "Child") | Search modes -<br>Boolean/Phrase | Interface -<br>EBSCOhost<br>Research<br>Databases<br>Search Screen -<br>Basic Search<br>Database -<br>CINAHL with Full<br>Text | 365,205 |
| S4 | adherence OR compliance                                     | Search modes -<br>Boolean/Phrase | Interface -<br>EBSCOhost<br>Research<br>Databases<br>Search Screen -                                                           | 53,397  |

|    |                                                                                                   |                               |                                                                                                        |        |
|----|---------------------------------------------------------------------------------------------------|-------------------------------|--------------------------------------------------------------------------------------------------------|--------|
|    |                                                                                                   |                               | Basic Search Database - CINAHL with Full Text                                                          |        |
| S3 | (MH "Medication Compliance") OR (MH "Patient Compliance")                                         | Search modes - Boolean/Phrase | Interface - EBSCOhost Research Databases Search Screen - Basic Search Database - CINAHL with Full Text | 24,430 |
| S2 | app OR apps OR mobile phone* OR cell phone* OR text*                                              | Search modes - Boolean/Phrase | Interface - EBSCOhost Research Databases Search Screen - Basic Search Database - CINAHL with Full Text | 16,469 |
| S1 | (MH "Text Messaging") OR (MH "Cellular Phone") OR (MH "Mobile Applications") OR (MH "Smartphone") | Search modes - Boolean/Phrase | Interface - EBSCOhost Research Databases Search Screen - Basic Search Database - CINAHL with Full Text |        |

**CINAHL: 101**

---

**PsycINFO – searched August 11, 2015**

|    |                  |                               |                                                                       |     |
|----|------------------|-------------------------------|-----------------------------------------------------------------------|-----|
| S4 | S1 AND S2 AND S3 | Search modes - Boolean/Phrase | Interface - EBSCOhost Research Databases Search Screen - Basic Search | 153 |
|----|------------------|-------------------------------|-----------------------------------------------------------------------|-----|

|    |                                                                                                                                          |                                  |                                                                                                                |         |
|----|------------------------------------------------------------------------------------------------------------------------------------------|----------------------------------|----------------------------------------------------------------------------------------------------------------|---------|
|    |                                                                                                                                          |                                  | Database -<br>PsycINFO                                                                                         |         |
| S3 | (child* OR juvenile OR adolescen* OR<br>teenage* OR youth* OR pediatric*)                                                                | Search modes -<br>Boolean/Phrase | Interface -<br>EBSCOhost<br>Research<br>Databases<br>Search Screen -<br>Basic Search<br>Database -<br>PsycINFO | 827,019 |
| S2 | DE "Compliance" OR compliance OR<br>adherence                                                                                            | Search modes -<br>Boolean/Phrase | Interface -<br>EBSCOhost<br>Research<br>Databases<br>Search Screen -<br>Basic Search<br>Database -<br>PsycINFO | 40,700  |
| S1 | (DE "Mobile Devices") OR (DE "Cellular<br>Phones") OR "text messaging" OR "cell<br>phone*" OR app OR apps OR "mobile<br>phone*" OR text* | Search modes -<br>Boolean/Phrase | Interface -<br>EBSCOhost<br>Research<br>Databases<br>Search Screen -<br>Basic Search<br>Database -<br>PsycINFO | 101,572 |

**PsycINFO: 153**

---

***Totals as of August 11, 2015***

PubMed: 432

Embase: 313

CINAHL: 101

Cochrane Central: 137

PsycINFO: 153

**Total: 1136**

**Deduped against PubMed: removed 373**

**Unique remaining (non-PubMed): 331**

---

**Web of Science: searched Sep 17, 2015**

((text messaging OR texting OR mobile phone OR cell phone OR cell phones OR cellular phone OR cellular telephone OR mobile telephone OR mobile application OR mobile app OR mobile applications OR mobile apps OR portable software app OR portable software application OR portable software applications OR portable software apps)) AND **TOPIC:** ((“patient compliance” OR “adherence” OR “compliance”)) AND **TOPIC:** ((“child” OR child\* OR “juvenile” OR adolescen\* OR teenage\* OR youth\* OR pediatric\*))

**Results: 169**

---

**CRD: searched Sep 17, 2015**

(text messaging OR texting OR mobile phone OR cell phone OR cell phones OR cellular phone OR cellular telephone OR mobile telephone OR mobile application OR mobile app OR mobile applications OR mobile apps OR portable software app OR portable software application OR portable software applications OR portable software apps)

AND

(patient compliance OR adherence OR compliance)

AND

(child OR child\* OR juvenile OR adolescen\* OR teenage\* OR youth\* OR pediatric\*)

**Results: 10 (all from DARE) – also included search of NHTA database – no results**

---

**Inspec: searched Sep 17, 2015**

(text messaging OR texting OR mobile phone OR cell phone OR cell phones OR cellular phone OR cellular telephone OR mobile telephone OR mobile application OR mobile app OR mobile applications OR mobile apps OR portable software app OR portable software application OR portable software applications OR portable software apps)

AND

(patient compliance OR adherence OR compliance)

AND

(child OR child\* OR juvenile OR adolescen\* OR teenage\* OR youth\* OR pediatric\*)

**INSPEC: 23**

---

**IEEE: November 6, 2015**

**Simplified search because IEEE will not support more than 15 search terms.**

("text messaging" OR mobile OR "cell phone" OR "cell phones" OR portable)

AND

(adherence OR compliance)

AND

(child OR child\* OR juvenile OR adolescen\* OR teenage\* OR youth\* OR pediatric\*)

**IEEE: 16**

---

**Grey Literature search**

**Proquest Dissertations: November 6, 2015**

("text messaging" OR texting OR "mobile phone" OR "mobile phones" OR "cell phone" OR "cell phones" OR "cellular phone" OR "cellular telephone" OR "mobile telephone" OR "mobile application" OR "mobile app" OR "mobile applications" OR "mobile apps" OR "portable software app" OR "portable software application" OR "portable software applications" OR "portable software apps")

AND

(adherence OR compliance)

AND

(child OR child\* OR juvenile OR adolescen\* OR teenage\* OR youth\* OR pediatric\*)

**Proquest: 6 results**

---

---

**Scopus: November 6, 2015**

("text messaging" OR texting OR "mobile phone" OR "mobile phones" OR "cell phone" OR "cell phones" OR "cellular phone" OR "cellular telephone" OR "mobile telephone" OR "mobile application" OR "mobile app" OR "mobile applications" OR "mobile apps" OR "portable software app" OR "portable software application" OR "portable software applications" OR "portable software apps")

AND

(adherence OR compliance)

AND

(child OR child\* OR juvenile OR adolescen\* OR teenage\* OR youth\* OR pediatric\*)

**Scopus: 663**

---

**ClinicalTrials.gov: searched November 6, 2015**

(text messaging OR mobile OR cell phone OR cell phones)

AND

(adherence OR compliance)

AND

(child OR child\* OR juvenile OR adolescen\* OR teenage\* OR youth\* OR pediatric\*)

**ClinicalTrials.gov: 237 documents**

**Controlled Clinical Trials: searched November 6, 2015 – 2 results**

---

**WHO Clinical Trials: searched November 6, 2015**

(text messaging OR mobile OR cell phone OR cell phones)

AND

(adherence OR compliance)

**0 results when add child; 5 results when leave out. Went with 5 results.**

---

**Google Scholar: searched November 21, 2015**

Suggested search strategies:

allintitle: text messaging adherence child OR children OR juvenile OR adolescent OR teenager OR youth OR pediatric (n=5)

allintitle: mobile adherence child OR children OR juvenile OR adolescent OR teenager OR youth OR pediatric (n=8)

allintitle: SMS adherence child OR children OR juvenile OR adolescent OR teenager OR youth OR pediatric (n=1)

allintitle: portable adherence child OR children OR juvenile OR adolescent OR teenager OR youth OR pediatric (n=2)

**Google scholar: 15 results**

---

**Journal of Medical Internet Research (JMIR): searched April 27, 2017**

**Theme 238:** E-collection “mHealth for treatment adherence”

**Link:** <https://mhealth.jmir.org/themes/188>

**JMIR database:** Keyword “adolescents” in the title or abstract

Total number of articles identified in JMIR that included adolescents: 203
