# Supplementary material for: Text Messaging and Mobile Phone Apps as Interventions to Improve Adherence in Adolescents With Chronic Health Conditions: A Systematic Review
Source: PubMed Central journal article supplement (PMC5447825; doi:10.2196/mhealth.7798), 2017-05-15
Supplement: mhealth_v5i5e66_app3.pdf [file mhealth_v5i5e66_app3.pdf]

### Multimedia Appendix 3: Outcomes of text message interventions

| Author/year<br>(Condition)                    | Study Outcomes                                                                                                                                                                                                                                                                                                                                                                                                                                                                                                                                                                                                                                                                                                                                                                                                                                                                                                                                                                                                                                                                                                                                                                                                                                                 |
|-----------------------------------------------|----------------------------------------------------------------------------------------------------------------------------------------------------------------------------------------------------------------------------------------------------------------------------------------------------------------------------------------------------------------------------------------------------------------------------------------------------------------------------------------------------------------------------------------------------------------------------------------------------------------------------------------------------------------------------------------------------------------------------------------------------------------------------------------------------------------------------------------------------------------------------------------------------------------------------------------------------------------------------------------------------------------------------------------------------------------------------------------------------------------------------------------------------------------------------------------------------------------------------------------------------------------|
| Boker et al, 2012<br>(Acne) [34]              | <p><b>Adherence:</b></p> <ul style="list-style-type: none"> <li>• Mean adherence for both daily medications over 12 weeks: 33.9% in text-group vs. 36.5% in controls (p=0.75)</li> <li>• Average self-reported adherence rate in text-group was 128.5 doses (74.4%)</li> <li>• In the entire cohort, patients with higher adherence rates had greater decrease in lesion count at week 12 (non-significant, NS)</li> </ul> <p><b>Clinical:</b></p> <ul style="list-style-type: none"> <li>• Investigator Global Assessment scores (baseline vs. 12 wk): 2.3 vs. 1.2 (-1.07) in text-group; 2.4 vs. 1.6 (0.68) in controls, (p=0.37)</li> <li>• Proportion of patients with “clear” or “almost clear” Investigator Global Assessment score at week 12: 73.3% in text-group vs. 50% in controls (p=0.19)</li> <li>• Mean self-reported improvement of acne severity by PGS: 55.3% in text-group vs. 57.5% in controls (NS)</li> <li>• Total acne lesion count reduction (baseline vs. week 12), by Investigator Global Assessment: 66.6% in text-group vs. 53.4% in controls (p=0.21)</li> <li>• Dermatology Quality of Life Index scores (baseline vs. week 12): 55.7 ± 22.6 vs. 96 ± 15.9 in text-group; 53.8 ± 26.8 vs. 94.3 ± 18 in controls (NS)</li> </ul> |
| Fabbrocini et al,<br>2014 (Acne) [39]         | <p><b>Adherence:</b></p> <ul style="list-style-type: none"> <li>• Adherence (baseline vs. 12 wk): 4.1 vs. 6.6 days/wk in text-group; 4.3 vs. 4.9 days/wk in controls, (p &lt;0.0001)</li> </ul> <p><b>Clinical:</b></p> <ul style="list-style-type: none"> <li>• Global Acne Grading system scores (baseline vs. 12 wk): 25.3 ± 8.9 vs. 8.7 ± 3.6 in text-group; 24.7 ± 7.6 vs. 16.2 ± 5.6 in controls, (p &lt;0.0001)</li> <li>• Dermatology Quality of Life Index scores (baseline vs. 12 wk): 9.2 ± 2.2 vs. 5.4 ± 1.8 in text-group; 9.5 ± 1.8 vs. 8 ± 1.4 in controls, (p &lt;0.0001)</li> <li>• Cardiff Acne Disability Index scores (baseline vs. 12 wk): 8.6 ± 1.3 vs. 2 ± 0.8 in text-group vs. 7.8 ± 1.2 vs. 5.1 ± 0.8 in controls, (p &lt;0.0001)</li> <li>• Patient-Doctor Depth-of-Relationship Scale scores (baseline vs. 12 wk): 15 vs. 25 in text-group, 11 vs. 18 in controls.</li> <li>• Most patients were satisfied with the text-group (65% very and 30% quite satisfied)</li> </ul>                                                                                                                                                                                                                                                       |
| Ostojic et al, 2005<br>(Asthma) [47]          | <p><b>Adherence:</b></p> <ul style="list-style-type: none"> <li>• No significant difference among study groups in daily consumption or adherence of inhaled medicine (steroids: 625 ± 332 vs. 530 ± 200 micg, p=0.574; B2-agonists: 118 ± 63 vs. 84 ± 28 micg, p=0.383)</li> </ul> <p><b>Clinical:</b></p> <ul style="list-style-type: none"> <li>• Peak expiratory flow (PEF) variability, mean (standard deviation, SD): 16.12 ± 6.93% in text-group; 27.74 ± 10.01% in controls (p=0.049)</li> <li>• No significant difference among study groups in forced vital capacity</li> <li>• Mean forced expiratory volume in first second (FEV1) was similar in the two groups before and after the study</li> <li>• FEV1, mean (SD): 81.25 ± 17.31 in text-group vs. 77.63 ± 14.80 in controls (p=0.014)</li> <li>• Cough symptoms (0-3, 3 being worst): 1.42 ± 0.28 in text-group vs. 1.85 ± 0.43 in controls (p&lt;0.05)</li> <li>• Night symptoms (0-3, 3 being worst): 0.85 ± 0.32 in text-group vs. 1.22 ± 0.23 in controls (p&lt;0.05)</li> </ul>                                                                                                                                                                                                          |
| Louch et al, 2013<br>(Diabetes Mellitus) [43] | <p><b>Adherence:</b></p> <ul style="list-style-type: none"> <li>• Intervention significantly improved evening injection rates only in the low conscientiousness and low Conscientiousness and consideration of future consequences (CFC) groups (no additional details available)</li> </ul>                                                                                                                                                                                                                                                                                                                                                                                                                                                                                                                                                                                                                                                                                                                                                                                                                                                                                                                                                                   |

|                                                          |                                                                                                                                                                                                                                                                                                                                                                                                                                                                                                                                                                                                                                                                                                                                                                                                                                                                                                                                                                                                                                                                                                                                                                                                                                                                                                                           |
|----------------------------------------------------------|---------------------------------------------------------------------------------------------------------------------------------------------------------------------------------------------------------------------------------------------------------------------------------------------------------------------------------------------------------------------------------------------------------------------------------------------------------------------------------------------------------------------------------------------------------------------------------------------------------------------------------------------------------------------------------------------------------------------------------------------------------------------------------------------------------------------------------------------------------------------------------------------------------------------------------------------------------------------------------------------------------------------------------------------------------------------------------------------------------------------------------------------------------------------------------------------------------------------------------------------------------------------------------------------------------------------------|
|                                                          | <ul style="list-style-type: none"> <li>• Patients with high conscientiousness showed few differences in evening injection rates across groups</li> <li>• Patients with low conscientiousness showed clear differences across groups</li> <li>• Significant interactions of condition with conscientiousness (<math>p=0.001</math>), CFC (<math>p=0.007</math>) and a 3-way interaction among condition, conscientiousness, and CFC (<math>p=0.009</math>)</li> </ul>                                                                                                                                                                                                                                                                                                                                                                                                                                                                                                                                                                                                                                                                                                                                                                                                                                                      |
| Mulvaney et al, 2012 (Diabetes Mellitus) [46]            | <p><b>Adherence:</b></p> <ul style="list-style-type: none"> <li>• At 3 months, the mean glycosylated hemoglobin (HbA1c) level in the intervention group was unchanged (8.8%), but the mean level in the control group was higher (9.9%), <math>p=0.006</math></li> </ul> <p><b>Usability/Acceptability:</b></p> <ul style="list-style-type: none"> <li>• Website log-ins average 3/wk (range 1-8)</li> <li>• Average messages: <ul style="list-style-type: none"> <li>◦ Received 10/wk (range 8-12)</li> <li>◦ Newly created 2.9 (SD 2.7)</li> <li>◦ Additionally scheduled 5.0 (SD 4.2)</li> <li>◦ Deleted 1.8 (SD 0.9)</li> </ul> </li> <li>• 9 people (friend or family) were nominated by participants to contribute messages to help with diabetes</li> <li>• 33% of new messages focused on new reminders and motivation for blood glucose monitoring</li> <li>• System usability and satisfaction were rated highly</li> <li>• There was a significant main effect of time (<math>p=0.02</math>), no significant main effect of group (<math>p=0.42</math>), and a significant interaction between group and time (<math>p=0.006</math>)</li> </ul>                                                                                                                                                                |
| Franklin et al, 2006 (Diabetes Mellitus) [40]            | <p><b>Adherence:</b></p> <ul style="list-style-type: none"> <li>• Self-reported adherence scores: <math>70.4 \pm 20.0</math> in Conventional insulin therapy (CIT) alone vs. <math>77.2 \pm 16.1</math> in CIT and Sweet Talk (ST) (95% CI <math>+0.4, +17.4</math>, <math>p=0.042</math>)</li> <li>• Mean glycemic control improved in intensive insulin therapy (IIT) and ST (<math>9.2 \pm 2.2\%</math>, 95% CI <math>-1.9, -0.5</math>, <math>P &lt; 0.001</math>), compared to CIT and ST</li> <li>• Self-efficacy for diabetes scores: <math>56.0 \pm 13.7</math> in CIT alone vs. <math>62.1 \pm 6.6</math> in CIT and ST (95% CI <math>+2.6, +7.5</math>, <math>p=0.003</math>)</li> </ul> <p><b>Usability/Acceptability:</b></p> <ul style="list-style-type: none"> <li>• Patients' perception of the quantity of support they received from the diabetes team was higher in ST groups, but not support from family and friends</li> <li>• Sweet Talk system feedback: <ul style="list-style-type: none"> <li>◦ 81% helpful for DM self-management</li> <li>◦ 90% wanted to continue text messages</li> <li>◦ 97% liked messages frequency (1-2 daily) 20% disliked repeated similar messages</li> </ul> </li> </ul>                                                                                             |
| Dowshen et al, 2012 (Human Immunodeficiency Virus) [37]  | <p><b>Adherence:</b></p> <ul style="list-style-type: none"> <li>• Mean visual analogue scale (VAS) scores (0-100, with 100 being most adherent): <math>74.7</math> (wk 0) vs. <math>93.3</math> (wk 12), (<math>p &lt; 0.001</math>); <math>74.7</math> (wk 0) vs. <math>93.1</math> (wk 24), (<math>p &lt; 0.001</math>)</li> <li>• AIDS Clinical Trials Group questionnaire 4-day recall (0-4, with 4 being most adherent): <math>2.33</math> (wk 0) vs. <math>3.24</math> (wk 12), (<math>p=0.002</math>); <math>2.33</math> (wk 0) vs. <math>3.19</math> (wk 24), (<math>p=0.005</math>)</li> <li>• CD4 cell count or viral load (wk 0 vs. wk 12 or 24-wk: a trend toward improvement with a small to moderate effect size (Cohen <math>d: -0.51</math> to <math>0.22</math>)</li> </ul> <p><b>Usability/Acceptability:</b></p> <ul style="list-style-type: none"> <li>• A total of 15,387 messages were sent through the Intelecare platform, 14,220 messages were successfully sent</li> <li>• Of the 7110 messages requesting participants to respond, 3414 (48%) replied whether they took their medications or not</li> <li>• 20/21 (95%) participants found texts helpful to avoid missing doses</li> <li>• 17/21 (81%) participants wanted to continue to receive text after the study is completed</li> </ul> |
| Garofalo et al, 2015 (Human Immunodeficiency Virus) [41] | <p><b>Adherence:</b></p> <ul style="list-style-type: none"> <li>• VAS adherence difference between intervention and controls (0 vs. 3 mon): 7% points (95% CI, <math>0.91, 13.9</math>) (<math>p &lt; 0.05</math>); 2.57 OR for <math>\geq 90\%</math> adherence (95% CI <math>1.01-6.54</math>) (<math>p &lt; 0.05</math>)</li> </ul>                                                                                                                                                                                                                                                                                                                                                                                                                                                                                                                                                                                                                                                                                                                                                                                                                                                                                                                                                                                    |

|                                                     |                                                                                                                                                                                                                                                                                                                                                                                                                                                                                                                                                                                                                                                                                                                                                                                                                                                                                                                                                                                                                                                                                                                                                                                                                                                                                                                                                                                              |
|-----------------------------------------------------|----------------------------------------------------------------------------------------------------------------------------------------------------------------------------------------------------------------------------------------------------------------------------------------------------------------------------------------------------------------------------------------------------------------------------------------------------------------------------------------------------------------------------------------------------------------------------------------------------------------------------------------------------------------------------------------------------------------------------------------------------------------------------------------------------------------------------------------------------------------------------------------------------------------------------------------------------------------------------------------------------------------------------------------------------------------------------------------------------------------------------------------------------------------------------------------------------------------------------------------------------------------------------------------------------------------------------------------------------------------------------------------------|
|                                                     | <ul style="list-style-type: none"> <li>• VAS adherence difference between intervention and controls (0 vs. 6 mon): 3.5% points (95% CI, – 2.03, 9.11) (NS); 2.12 OR for ≥90% adherence (95 % CI 1.01–4.45) (p&lt;0.05)</li> <li>• Intervention sustainability effect (VAS ≥90% during follow up: 58% at 9-month vs. 61% at 12-month (p=0.6)</li> <li>• Intervention effect on VAS (≥90%) after cross-over (initial control group): 51% at baseline (6-month) vs. 65% at 12-month (p=0.07)</li> <li>• No significant differences in either log viral load between the two study arms at either 3- or 6-month follow-up</li> <li>• Participants with high levels of depression and marijuana use (32%) had significantly lower adherence compared to those with neither (p=0.005)</li> </ul> <p><b>Usability/Acceptability:</b></p> <ul style="list-style-type: none"> <li>• A total of 9,586 reminder messages sent, 8,512 were successfully received (89%)</li> <li>• 58% responded to the reminders at least once</li> <li>• 100% would recommend intervention for a friend on daily meds</li> <li>• 81 % wanted to continue to receive text after the study is completed</li> <li>• 95 % satisfied with intervention overall, supported by open-text comments</li> </ul>                                                                                                                   |
| <p>Miloh et al, 2009 (Liver Transplant) [45]</p>    | <p><b>Adherence:</b></p> <ul style="list-style-type: none"> <li>• Mean tacrolimus levels SD values (before vs. after): 3.46 ± 2.17 vs. 1.37 ± 1.01 mg/L (p&lt;0.005)</li> <li>• Number of patients with tacrolimus level SD values above threshold (SD &gt;25) decreased from 24 to 6 (P=0.19)</li> <li>• Mean Sirolimus level SD values (before vs. after): 5 vs. 1.8 g/L (p=0.01)</li> <li>• Mean tacrolimus levels SD values during the study (before vs. after): <ul style="list-style-type: none"> <li>o One-medication regimen: 3.18 ± 2.35 to 1.27 ± 1.24 g/L (p&lt;0.005)</li> <li>o Two-medication regimen: 3.65 ± 2.10 to 1.45 ± 0.74 g/L (p&lt;0.005)</li> <li>o Three-medication regimen: 4.15 ± 1.62 to 1.61 ± 0.52 g/L (p=0.02)</li> </ul> </li> <li>• The mean age of patients: self-administration of medications (17.38 ± 4.06 years); Medications delivered through parents (7.75 ± 5.21 years) (p&lt;0.005)</li> </ul> <p><b>Clinical:</b></p> <ul style="list-style-type: none"> <li>• Number of histologically proven, acute, cellular rejections (before vs. after): 12 vs. 2 episodes (p=0.02)</li> </ul> <p><b>Usability/Acceptability:</b></p> <ul style="list-style-type: none"> <li>• Compliance rates during study: 69% of patients completed the study</li> <li>• 48% of patients dropped out</li> <li>• No risk factors for dropout were identified</li> </ul> |
| <p>McKenzie et al, 2015 (Liver Transplant) [44]</p> | <p><b>Adherence:</b></p> <ul style="list-style-type: none"> <li>• Laboratory testing participation rate (before vs. after): 58% (Mean=0.58, SD=0.31) vs. 78% (Mean=0.78, SD=0.30), (p&lt;0.001)</li> <li>• Laboratory testing participation rate (intervention vs. controls): at baseline, no difference (p=0.8); after study, high rates in intervention-group (p=0.003)</li> </ul> <p><b>Clinical:</b></p> <ul style="list-style-type: none"> <li>• 11 patients changed the rate of their laboratory frequency based on their clinical situation</li> </ul> <p><b>Usability/Acceptability:</b></p> <ul style="list-style-type: none"> <li>• Participants preferred secure email (32%) or text messaging (68%) as the primary way of medical communication</li> </ul>                                                                                                                                                                                                                                                                                                                                                                                                                                                                                                                                                                                                                       |

|                                                                 |                                                                                                                                                                                                                                                                                                                                                                                                                                                                                                                                                                                                                                                                                                                                                                                                                                                                                                                                                                                                                                                                                                                                                                                                                                                                                                                                                                                                                                                                                                                                                                                                                                                                                                                                                                                                                                                                                                                                   |
|-----------------------------------------------------------------|-----------------------------------------------------------------------------------------------------------------------------------------------------------------------------------------------------------------------------------------------------------------------------------------------------------------------------------------------------------------------------------------------------------------------------------------------------------------------------------------------------------------------------------------------------------------------------------------------------------------------------------------------------------------------------------------------------------------------------------------------------------------------------------------------------------------------------------------------------------------------------------------------------------------------------------------------------------------------------------------------------------------------------------------------------------------------------------------------------------------------------------------------------------------------------------------------------------------------------------------------------------------------------------------------------------------------------------------------------------------------------------------------------------------------------------------------------------------------------------------------------------------------------------------------------------------------------------------------------------------------------------------------------------------------------------------------------------------------------------------------------------------------------------------------------------------------------------------------------------------------------------------------------------------------------------|
|                                                                 | <ul style="list-style-type: none"> <li>• During the study period, all participants continued the intervention and no phone numbers were disconnected</li> <li>• 30 patients (77%) responded with at least one text message during the study</li> <li>• 12 patients (29%) communicated with additional messages, mainly to clarify a revised laboratory schedule</li> <li>• Text messages sent: <ul style="list-style-type: none"> <li>◦ Average <math>5.7 \pm 3.6</math> (range 1–13)/patient</li> <li>◦ 95 “YES” (Mean <math>3.2 \pm 2.8</math>, range 0–11), 94% correctly completed lab test</li> <li>◦ 70 “NO” (Mean <math>2.4 \pm 2.4</math>, range 0–11), 96% lab test not completed by chart review</li> <li>◦ Agreement <math>k=0.89</math>, 95% CI=0.82, 0.96 (<math>p&lt;0.001</math>)</li> </ul> </li> <li>• Intervention feedback: <ul style="list-style-type: none"> <li>◦ 80% positively responded and found it helpful</li> <li>◦ 70% felt that reminders definitely or possibly “made them more likely to get laboratory tests”</li> <li>◦ Only 3 patients had technical issues</li> <li>◦ 71% wanted the reminders to continue after study period</li> <li>◦ 97% reported that reminders could help at least one aspect of self-management</li> </ul> </li> </ul>                                                                                                                                                                                                                                                                                                                                                                                                                                                                                                                                                                                                                                                |
| <p>Estepp et al, 2014<br/>(Sickle Cell Disease) [38]</p>        | <p><b>Adherence:</b></p> <ul style="list-style-type: none"> <li>• No significant improvement in medication possession ratio or hydroxyurea adherence before and after SIMON</li> <li>• At the end of the study, participants had higher mean corpuscular volume, hemoglobin levels and fetal hemoglobin percentages, and lower absolute reticulocyte counts and bilirubin levels, suggesting improved adherence to hydroxyurea</li> <li>• Participant’s change in medication possession ratio over time was predictor of improved fetal hemoglobin percentages</li> </ul> <p><b>Clinical:</b></p> <ul style="list-style-type: none"> <li>• No significant differences in emergency room visits or hospitalization or prior to and after initiation of SIMON</li> <li>• Outpatient visits: <ul style="list-style-type: none"> <li>◦ Median of 9 visits (inter-quartile range, 7–11) one-year post-SIMON initiation</li> <li>◦ Median decrease of 1 visit (<math>p=0.013</math>), compared to year pre-SIMON</li> </ul> </li> </ul>                                                                                                                                                                                                                                                                                                                                                                                                                                                                                                                                                                                                                                                                                                                                                                                                                                                                                                 |
| <p>Ting et al, 2011<br/>(Systemic Lupus Erythematosus) [48]</p> | <p><b>Visit Adherence study:</b></p> <ul style="list-style-type: none"> <li>• Adherence rates: pre: 13/70 (19%) non-adherent, post: 7/70 (10%) non-adherent (<math>p=0.01</math>), and overall higher than baseline (<math>p=0.005</math>)</li> <li>• Higher adherence to clinic visits with: <ul style="list-style-type: none"> <li>◦ White race (<math>p=0.04</math>)</li> <li>◦ Non-Medicaid status (<math>p=0.03</math>)</li> <li>◦ Increased distance from hospital (<math>p=0.008</math>)</li> </ul> </li> <li>• Patients with more frequent visits had: <ul style="list-style-type: none"> <li>◦ More frequent no-shows, ER visits, and hospital admissions</li> <li>◦ Worse Systemic Lupus Erythematosus Disease Activity Index scores</li> <li>◦ Were treated with more medications</li> </ul> </li> <li>• Number of no-shows to clinic correlated with the number of ER visits and hospital admissions across all time periods</li> <li>• Patients with lower median family income had: <ul style="list-style-type: none"> <li>◦ More frequent cancellations (<math>p=0.04</math>)</li> <li>◦ More hospitalizations (<math>p = 0.01</math>)</li> <li>◦ Worse mean Systemic Lupus Erythematosus Disease Activity Index scores (<math>p = 0.0008</math>)</li> </ul> </li> </ul> <p><b>Medication Adherence study:</b></p> <ul style="list-style-type: none"> <li>• Hydroxychloroquine blood levels correlated with adherence rates measured by pharmacy refills (<math>r=0.5</math>, <math>p&lt;0.0001</math>) and Medication Adherence Self-Report Inventory (<math>r=0.47</math>, <math>p&lt;0.0001</math>)</li> <li>• Using Medication Adherence Self-Report Inventory, pharmacy refill, Hydroxychloroquine blood levels, text reminders had a small effect size (Cohen’s <math>d &lt;0.25</math>) on the adherence to Hydroxychloroquine with no difference in patients with daily or twice daily regimens</li> </ul> |

- |  |                                                                                                                                       |
|--|---------------------------------------------------------------------------------------------------------------------------------------|
|  | <ul style="list-style-type: none"><li>• In text reminders group, there was no improvement in participants' disease activity</li></ul> |
|--|---------------------------------------------------------------------------------------------------------------------------------------|
