# Supplementary material for: Text Messaging and Mobile Phone Apps as Interventions to Improve Adherence in Adolescents With Chronic Health Conditions: A Systematic Review
Source: JMIR Mhealth Uhealth. 2017 May 15;5(5):e66. doi: 10.2196/mhealth.7798 (PMC5447825; doi:10.2196/mhealth.7798)
Supplement: Multimedia Appendix 4 [file mhealth_v5i5e66_app4.pdf]

## Multimedia Appendix 4: Outcomes of smartphone app interventions

| Author/year (Condition)                         | Main Results                                                                                                                                                                                                                                                                                                                                                                                                                                                                                                                                                                                                                                                                                                                                                                                                                                                                                                                                                                                                                                                                                                                                                                                                                                                                                                                                                                                                                                                                                                                                                                                                                                                                                                                                                                                                                                                                                                                                                     |
|-------------------------------------------------|------------------------------------------------------------------------------------------------------------------------------------------------------------------------------------------------------------------------------------------------------------------------------------------------------------------------------------------------------------------------------------------------------------------------------------------------------------------------------------------------------------------------------------------------------------------------------------------------------------------------------------------------------------------------------------------------------------------------------------------------------------------------------------------------------------------------------------------------------------------------------------------------------------------------------------------------------------------------------------------------------------------------------------------------------------------------------------------------------------------------------------------------------------------------------------------------------------------------------------------------------------------------------------------------------------------------------------------------------------------------------------------------------------------------------------------------------------------------------------------------------------------------------------------------------------------------------------------------------------------------------------------------------------------------------------------------------------------------------------------------------------------------------------------------------------------------------------------------------------------------------------------------------------------------------------------------------------------|
| Hammonds et al, 2015<br>(Depression) [42]       | <p><b>Adherence:</b></p> <ul style="list-style-type: none"> <li>• Participants in intervention group were 3.5 times more likely to adhere to medication regimen than control group (<math>p=0.057</math>)</li> <li>• Adherence by pill count was not significantly different between groups</li> <li>• Overall adherence: 45% adherent (<math>\geq 80\%</math>), 40% under-users (<math>&lt; 80\%</math>), and 6% over-users (<math>&gt; 100\%</math>), all in controls</li> </ul> <p><b>Clinical:</b></p> <ul style="list-style-type: none"> <li>• Depression was not significantly different between groups</li> <li>• Medication under-users of were 3.4 more likely to endorse illicit drug use</li> </ul>                                                                                                                                                                                                                                                                                                                                                                                                                                                                                                                                                                                                                                                                                                                                                                                                                                                                                                                                                                                                                                                                                                                                                                                                                                                   |
| Cafazzo et al, 2012<br>(Diabetes Mellitus) [35] | <p><b>Self-management/Adherence:</b></p> <ul style="list-style-type: none"> <li>• Self-care inventory showed no significant changes in all dimensions, including adherence</li> <li>• The frequency of daily average blood glucose measurements increased by 50% from 2.4 to 3.6 per day (<math>p=0.006</math>)</li> <li>• Glycosylated hemoglobin (HbA1c) values did not significantly change over pilot period (<math>p=0.11</math>)</li> </ul> <p><b>Usability/Acceptability:</b></p> <ul style="list-style-type: none"> <li>• Study satisfaction was high, 88% stated that they would continue to use the system, and 50% of patients had more than 10 awards</li> </ul> <p><b>Clinical:</b></p> <ul style="list-style-type: none"> <li>• Diabetes HRQOL dimensions and parent–adolescent patient interactions showed no change over study-period</li> </ul>                                                                                                                                                                                                                                                                                                                                                                                                                                                                                                                                                                                                                                                                                                                                                                                                                                                                                                                                                                                                                                                                                                 |
| Creary et al, 2014 (Sickle Cell Disease) [36]   | <p><b>Adherence:</b></p> <ul style="list-style-type: none"> <li>• Morisky Medication Adherence Scale (MMAS-4) scores (<math>&lt; 2</math>): 9/14 participants at 2–4 months and 10/14 participants at 6 months (<math>p=0.004</math>)</li> <li>• Medication possession ratio adherence (median, IQR): pre-study 0.75 (0.59–0.82) vs. post-study 0.91 (0.85–1.00) (<math>p=0.02</math>)</li> <li>• Observed HU adherence rate: median of 93.3% for each month, 10/14 had <math>\geq 90\%</math> adherence, and 12/14 had <math>\geq 80\%</math> adherence</li> <li>• Mean corpuscular volume (median, IQR): pre-study 96 (91–107.9) vs. post-study 107.2 (96.3–113.3) (<math>p=0.009</math>)</li> <li>• HbF (median, IQR): pre-study 10.5 (6–17) and post-study 11.4 (9.3–18.9) (<math>p=0.03</math>)</li> <li>• Treatment Satisfaction Questionnaire for Medication (TSQM-9) in patients with MMAS-4 (<math>&lt; 2</math>) (mean, standard deviation): pre-study <math>82.8\% \pm 16.7\%</math> vs. post-study <math>95.6\% \pm 5.1\%</math> (<math>p=0.03</math>)</li> <li>• TSQM-9 in patients with medication possession ratio (<math>\geq 90</math>): pre-study <math>74.7\% \pm 16.6\%</math> vs. post-study <math>96.0\% \pm 5.3\%</math> (<math>p=0.008</math>)</li> </ul> <p><b>Usability/Acceptability:</b></p> <ul style="list-style-type: none"> <li>• Less than 20 minutes daily to complete study observations, record adherence, and provide feedback to the enrolled participants</li> <li>• Mobile-DOT Trial period: 13/14 completed in <math>&lt; 14</math> days and 1/14 completed in 30-days</li> <li>• Text messages didn't disrupt participants' daily activities</li> <li>• Mobile DOT was not intrusive</li> <li>• 13/14 participants completed Mobile-DOT in <math>&lt; 3</math> minutes daily</li> <li>• All participants continued to submit videos and receive alerts, feedback, and incentives as part of extension study</li> </ul> |
